# Supplementary material
Source: PubMed Central journal article supplement (PMC8317055)
Supplement: jamapsychiatry-e212274-s001.pdf [file jamapsychiatry-e212274-s001.pdf]

## Supplemental Online Content

Fond G, Nemani K, Etchecopar-Etchart D, et al. Association between mental health disorders and mortality among patients with COVID-19 in 7 countries: a systematic review and meta-analysis. *JAMA Psychiatry*. Published online July 27, 2021.  
doi:10.1001/jamapsychiatry.2021.2274

**eTable 1.** Newcastle–Ottawa quality assessment scale

**eTable 2.** Codes used for mental health disorders definitions according to the International Statistical Classification of Diseases and Related Health Problems

**eTable 3.** Matching and adjustment factors

**eFigure 1.** Funnel plot (adjusted odds ratios). The Egger's test is non-significant ( $p > 0.05$ )

**eFigure 2.** Forest plot of the association between mental health disorders and mortality (crude Odds Ratio)

**eFigure 3.** Forest plot of the association between severe mental health disorders and mortality (crude Odds Ratio)

This supplemental material has been provided by the authors to give readers additional information about their work.

**eTable 1.** Newcastle–Ottawa quality assessment scale.

| Author years       | Selection | Comparability | Exposure | Quality score |  |  |  |
|--------------------|-----------|---------------|----------|---------------|--|--|--|
| Reilev 2020        | 3         | 2             | 3        | Good          |  |  |  |
| Fond 2020          | 4         | 2             | 2        | Good          |  |  |  |
| Tzur-Bitan 2021    | 4         | 2             | 3        | Good          |  |  |  |
| Lee SW 2020        | 4         | 2             | 2        | Good          |  |  |  |
| Lee DY 2020        | 3         | 2             | 3        | Good          |  |  |  |
| Jeon 2020          | 3         | 2             | 2        | Good          |  |  |  |
| Poblador-Plou 2020 | 3         | 1             | 3        | Good          |  |  |  |
| Yang 2020          | 4         | 2             | 3        | Good          |  |  |  |
| Allen 2020         | 4         | 1             | 2        | Good          |  |  |  |
| Baillargeon 2020   | 3         | 2             | 3        | Good          |  |  |  |
| Egede 2020         | 4         | 2             | 2        | Good          |  |  |  |
| Nemani 2021        | 4         | 2             | 3        | Good          |  |  |  |
| Li 2020            | 3         | 2             | 3        | Good          |  |  |  |
| Wang 2021          | 3         | 2             | 2        | Good          |  |  |  |
|                    |           |               |          |               |  |  |  |

Good quality: 3 or 4 score in selection domain AND 1 or 2 in comparability domain AND 2 or 3 in outcome domain; Fair quality: 2 in selection domain AND 1 or 2 in comparability domain AND 2 or 3 in outcome/exposure domain; Poor quality: 0 or 1 in selection domain OR 0 in comparability domain OR 0 or 1 in outcome/exposure domain

**eFigure 1.** Funnel plot (adjusted odds ratios). The Egger’s test is non-significant ( $p>0.05$ ).

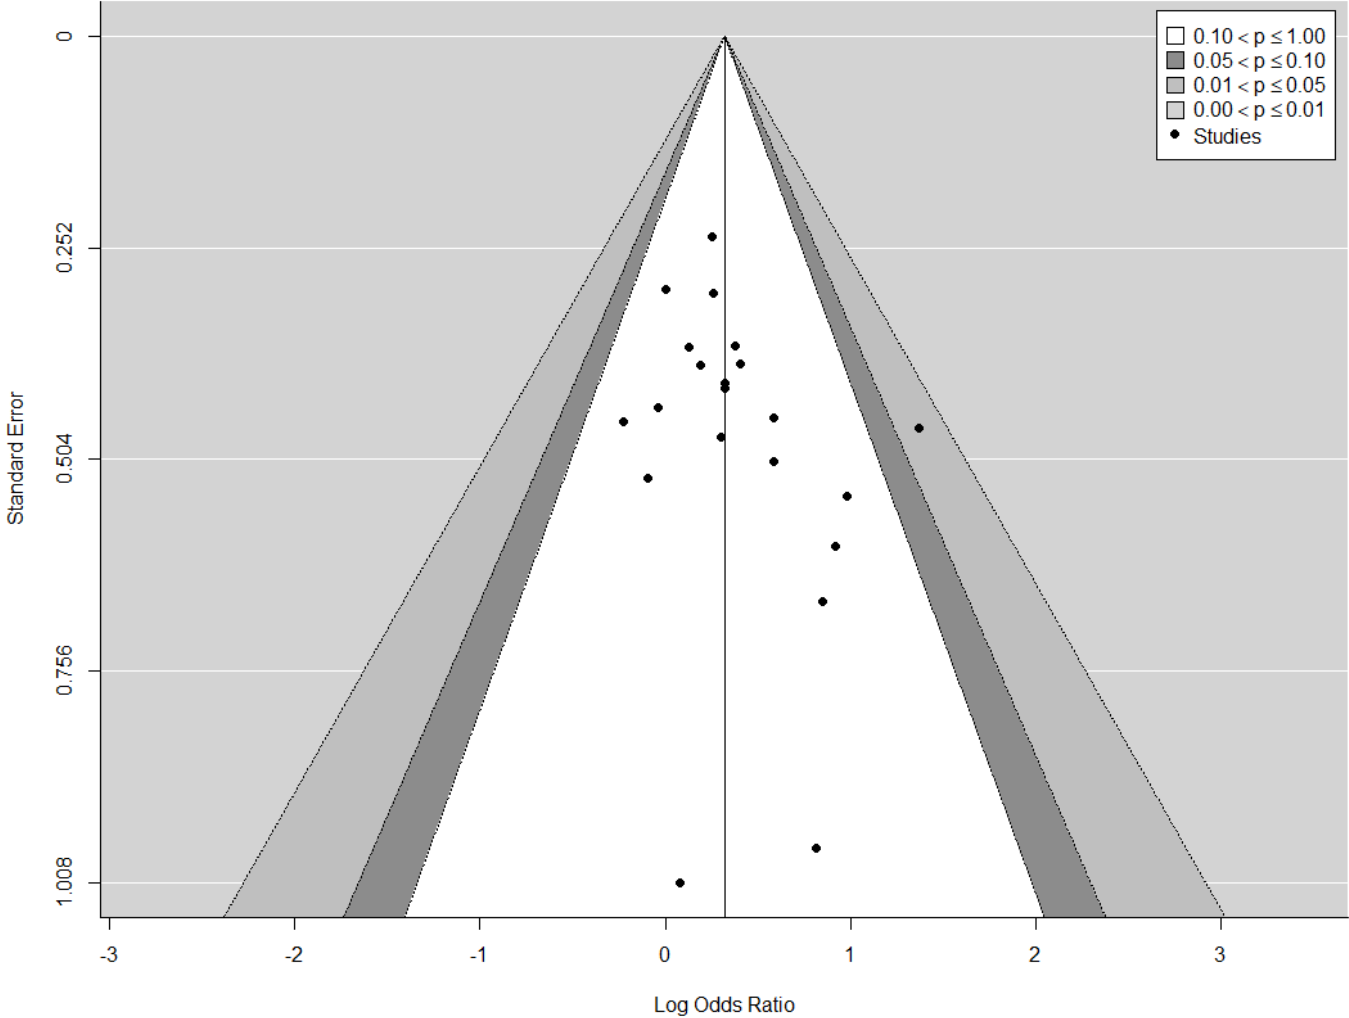

**eTable 2.** Codes used for mental health disorders definitions according to the International Statistical Classification of Diseases and Related Health Problems.

| References  | Mental health disorders groups                                                                                                                                                                                                                                                                                                                                                                                                                                                                                                                                                                                                                                                                                                                                                                                                                                                                                                                                                                                                                                                                                                                                     |
|-------------|--------------------------------------------------------------------------------------------------------------------------------------------------------------------------------------------------------------------------------------------------------------------------------------------------------------------------------------------------------------------------------------------------------------------------------------------------------------------------------------------------------------------------------------------------------------------------------------------------------------------------------------------------------------------------------------------------------------------------------------------------------------------------------------------------------------------------------------------------------------------------------------------------------------------------------------------------------------------------------------------------------------------------------------------------------------------------------------------------------------------------------------------------------------------|
| Denmark     |                                                                                                                                                                                                                                                                                                                                                                                                                                                                                                                                                                                                                                                                                                                                                                                                                                                                                                                                                                                                                                                                                                                                                                    |
| Reilev      | Mental health Disorders: F20* (schizophrenia) F25* (schizoaffective disorder) F30* F31* (bipolar disorders)<br>Alcohol or drug misuse: F10–16, F18–19;                                                                                                                                                                                                                                                                                                                                                                                                                                                                                                                                                                                                                                                                                                                                                                                                                                                                                                                                                                                                             |
| France      |                                                                                                                                                                                                                                                                                                                                                                                                                                                                                                                                                                                                                                                                                                                                                                                                                                                                                                                                                                                                                                                                                                                                                                    |
| Fond (1)    | Schizophrenia: F20* (schizophrenia) F22* (delusional disorders) F25* (schizoaffective disorder)                                                                                                                                                                                                                                                                                                                                                                                                                                                                                                                                                                                                                                                                                                                                                                                                                                                                                                                                                                                                                                                                    |
| Fond (2)    | Bipolar Disorders: F30* F31*                                                                                                                                                                                                                                                                                                                                                                                                                                                                                                                                                                                                                                                                                                                                                                                                                                                                                                                                                                                                                                                                                                                                       |
| Israel      |                                                                                                                                                                                                                                                                                                                                                                                                                                                                                                                                                                                                                                                                                                                                                                                                                                                                                                                                                                                                                                                                                                                                                                    |
| Tzur Bitan  | Schizophrenia: F20*                                                                                                                                                                                                                                                                                                                                                                                                                                                                                                                                                                                                                                                                                                                                                                                                                                                                                                                                                                                                                                                                                                                                                |
| South Korea |                                                                                                                                                                                                                                                                                                                                                                                                                                                                                                                                                                                                                                                                                                                                                                                                                                                                                                                                                                                                                                                                                                                                                                    |
| Lee SW      | <p>Non-affective psychotic disorders: F20* (schizophrenia) F22* (delusional disorders) F23* (acute and transient psychotic disorders) F24* (Shared psychotic disorder) F25* (schizoaffective disorder) F28 (other nonorganic psychotic disorders) F29 (unspecified nonorganic psychosis)</p> <p>Affective psychotic disorders: F30* F31* (bipolar disorders) +F32.3, F33.3 (Major depressive disorder with severe with psychotic feature)</p> <p>Mood disorders without psychotic symptoms: F32* (major depressive disorder) F33* (recurrent major depressive disorder) excluding F32.3 and F33.3, F34* (persistent mood disorder) F38* (other affective disorders) F39* (unspecified mood disorder)</p> <p>Anxiety-related and stress-related disorders: F40 (Phobic anxiety disorders) F41 (Other anxiety disorders) F42 (Obsessive-compulsive disorder) F43 (Reaction to severe stress, and adjustment disorders) F44 (Dissociative and conversion disorders) F45 (Somatoform disorders) F48 (Other nonpsychotic mental disorders)</p> <p>Alcohol or drug misuse: F10–16, F18–19;</p> <p>Eating disorders: F50</p> <p>Personality disorders: F60–63, F68–69</p> |

| References    | Mental health disorders groups                                                                                                                                                                                                                                                                                                                                                                                                                                                                                                                                                                                                   |
|---------------|----------------------------------------------------------------------------------------------------------------------------------------------------------------------------------------------------------------------------------------------------------------------------------------------------------------------------------------------------------------------------------------------------------------------------------------------------------------------------------------------------------------------------------------------------------------------------------------------------------------------------------|
| Lee DY        | No ICD codes (specific database codes) (Schizophrenia, Psychotic disorders, Bipolar disorders, Depressive disorder, Anxiety disorder, Panic disorder, Acute stress disorder, Insomnia, Dementia, Organic mental disorder, Psychoactive substance dependence, Psychoactive substance use disorder, Psychoactive substance-induced Organic mental disorder, Psychosomatic factor in physical condition)                                                                                                                                                                                                                            |
| Jeon          | Mental health disorders: any F00–F99 code<br><br>Schizophrenia F20* (schizophrenia) F22* (delusional disorders) F23* (acute and transient psychotic disorders) F25* (schizoaffective disorder) F28 (other nonorganic psychotic disorders) F29 (unspecified nonorganic psychosis)<br><br>Mood disorders: F30* F31* (bipolar disorders) F33* (recurrent major depressive disorder), F34* (persistent mood disorder) F38* (other affective disorders) F39* (unspecified mood disorder)                                                                                                                                              |
| Spain         |                                                                                                                                                                                                                                                                                                                                                                                                                                                                                                                                                                                                                                  |
| Poblador-plou | NA (Bipolar disorders, Depressive disorders, Anxiety disorders)                                                                                                                                                                                                                                                                                                                                                                                                                                                                                                                                                                  |
| UK            |                                                                                                                                                                                                                                                                                                                                                                                                                                                                                                                                                                                                                                  |
| Yang          | Mental health disorders:<br>Schizophrenia spectrum disorder; F20* (schizophrenia) F22* (delusional disorders) F23* (acute and transient psychotic disorders) F25* (schizoaffective disorder) F28 (other nonorganic psychotic disorders) F29 (unspecified nonorganic psychosis)<br>Depressive disorders: F32* (major depressive disorder) F33* (recurrent major depressive disorder),<br>Anxiety-related and stress-related disorders: F40 (Phobic anxiety disorders) F41 (Other anxiety disorders) F43 (Reaction to severe stress, and adjustment disorders)<br>Alcohol or drug misuse: F10–16, F18–19; Nicotine dependence: F17 |
| US            |                                                                                                                                                                                                                                                                                                                                                                                                                                                                                                                                                                                                                                  |
| Allen         | Alcohol or drug misuse: F10–16, F18–19;                                                                                                                                                                                                                                                                                                                                                                                                                                                                                                                                                                                          |
| Baillargeon   | NA (Substance use disorder)                                                                                                                                                                                                                                                                                                                                                                                                                                                                                                                                                                                                      |
| Egede.        | Mental health disorders : Schizophrenia F20* (schizophrenia) F22* (delusional disorders) F23* (acute and transient psychotic disorders) F25* (schizoaffective disorder) F28 (other nonorganic psychotic disorders) F29 (unspecified nonorganic psychosis) Mood disorders (including bipolar disorders and depressive disorders) F32* (major depressive disorder) F33* (recurrent major depressive disorder), F34* (persistent mood disorder) F38* (other affective disorders) F39* (unspecified mood disorder) Alcohol or drug misuse: F10–16, F18–19;                                                                           |
| Nemani        | Schizophrenia spectrum disorder; F20* (schizophrenia) F22* (delusional disorders) F23* (acute and transient psychotic disorders) F25* (schizoaffective disorder) F28 (other nonorganic psychotic disorders) F29 (unspecified nonorganic psychosis)                                                                                                                                                                                                                                                                                                                                                                               |

| References | Mental health disorders groups                                                                                                                                                                                                                                                                                                               |
|------------|----------------------------------------------------------------------------------------------------------------------------------------------------------------------------------------------------------------------------------------------------------------------------------------------------------------------------------------------|
|            | Mood disorders (including bipolar disorders and depressive disorders) F32* (major depressive disorder) F33* (recurrent major depressive disorder), F34* (persistent mood disorder) F38* (other affective disorders) F39* (unspecified mood disorder)<br><br>Anxiety disorders F40* (phobic anxiety disorders) F41* (other anxiety disorders) |
| Li         | Mental disorders included F01 to 99 (mental and behavioral health), specific codes G30 to 32 (Alzheimer disease), and codes X60 to 63 (self-injury).                                                                                                                                                                                         |
| Wang       | NA Mental disorder: schizophrenia, bipolar disorders, depressive disorders, attention deficit / hyperactivity disorder and alcohol and substance use disorder                                                                                                                                                                                |

NA: Not available.

**eTable 3.** Matching and adjustment factors.

| References    | Matching and adjustment factors                                                                                                                                                                                                 |
|---------------|---------------------------------------------------------------------------------------------------------------------------------------------------------------------------------------------------------------------------------|
| Denmark       |                                                                                                                                                                                                                                 |
| Reilev        | Age and sex                                                                                                                                                                                                                     |
| France        |                                                                                                                                                                                                                                 |
| Fond (1)      | Age, sex, social deprivation, smoking addiction, overweight and obesity, Charlson comorbidity index., origin of the patient, hospital category, number of hospital stays for COVID-19 and geographical areas of hospitalization |
| Fond (2)      | Age, sex, social deprivation, smoking addiction, overweight all Charlson comorbidities, obesity, origin of patients, ICU admission                                                                                              |
| Israel        |                                                                                                                                                                                                                                 |
| Tzur Bitan    | No adjusted OR                                                                                                                                                                                                                  |
| South Korea   |                                                                                                                                                                                                                                 |
| Lee SW        | age; sex; region of residence; history of diabetes, cardiovascular disease, cerebrovascular disease, chronic obstructive pulmonary disease, asthma, hypertension, or chronic kidney disease; and Charlson comorbidity index     |
| Lee DY        | No adjusted OR                                                                                                                                                                                                                  |
| Jeon          | Matching: age ( $\pm 2$ years), sex and Charlson comorbidity Index. Adjustment: type of insurance, a medical history of diabetes and pneumonia, and use of beta-blockers and anticonvulsants                                    |
| Spain         |                                                                                                                                                                                                                                 |
| Poblador-plou | Age                                                                                                                                                                                                                             |
| UK            |                                                                                                                                                                                                                                 |
| Yang          | No adjusted OR                                                                                                                                                                                                                  |
| US            |                                                                                                                                                                                                                                 |
| Allen         | Age, sex, race and comorbidities;                                                                                                                                                                                               |
| Baillargeon   | Age, sex, diabetes, obesity, hypertension, chronic obstructive pulmonary disease, ischemic heart disease and cerebrovascular disease                                                                                            |
| Egede.        | Age, sex, race/ethnicity, county, payer, tobacco use and body mass index                                                                                                                                                        |
| Nemani        | Age, sex, race/ethnicity, hypertension, diabetes, myocardial infarction, heart failure, chronic obstructive pulmonary disease, chronic kidney disease, smoking status and cancer                                                |
| Li            | Age, sex, other medical comorbidities and hospital location                                                                                                                                                                     |
| Wang          | No adjusted OR                                                                                                                                                                                                                  |

**eFigure 2.** Forest plot of the association between mental health disorders and mortality (crude Odds Ratio).

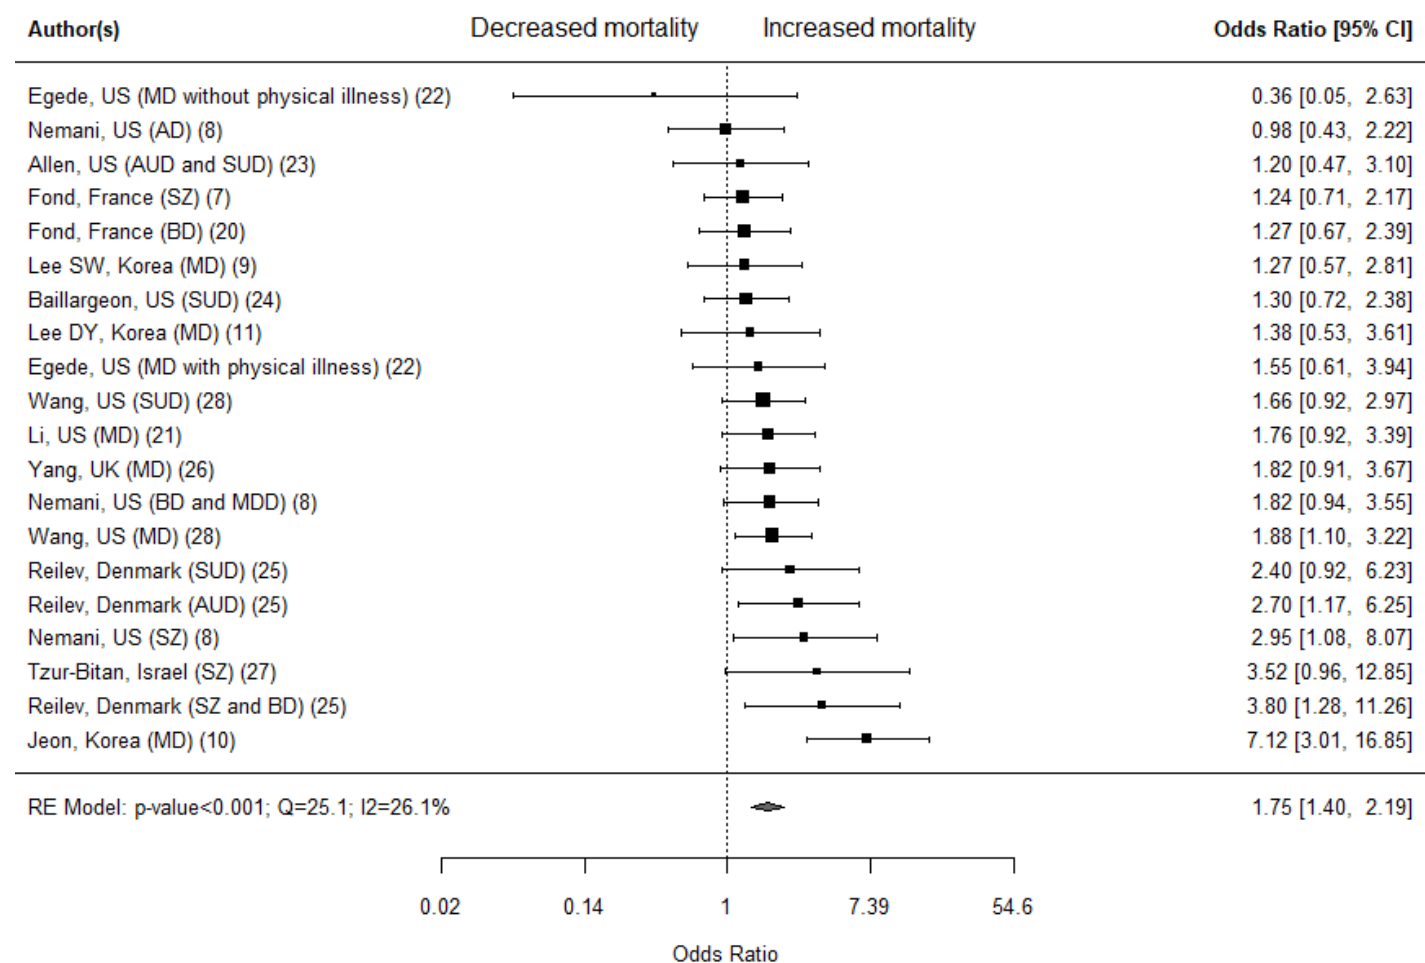

BD: Bipolar disorders; MD: Mental health disorders; MDD: Major depressive disorders; AD: Anxiety disorders; SZ: Schizophrenia.



**eFigure 3.** Forest plot of the association between severe mental health disorders and mortality (crude Odds Ratio).

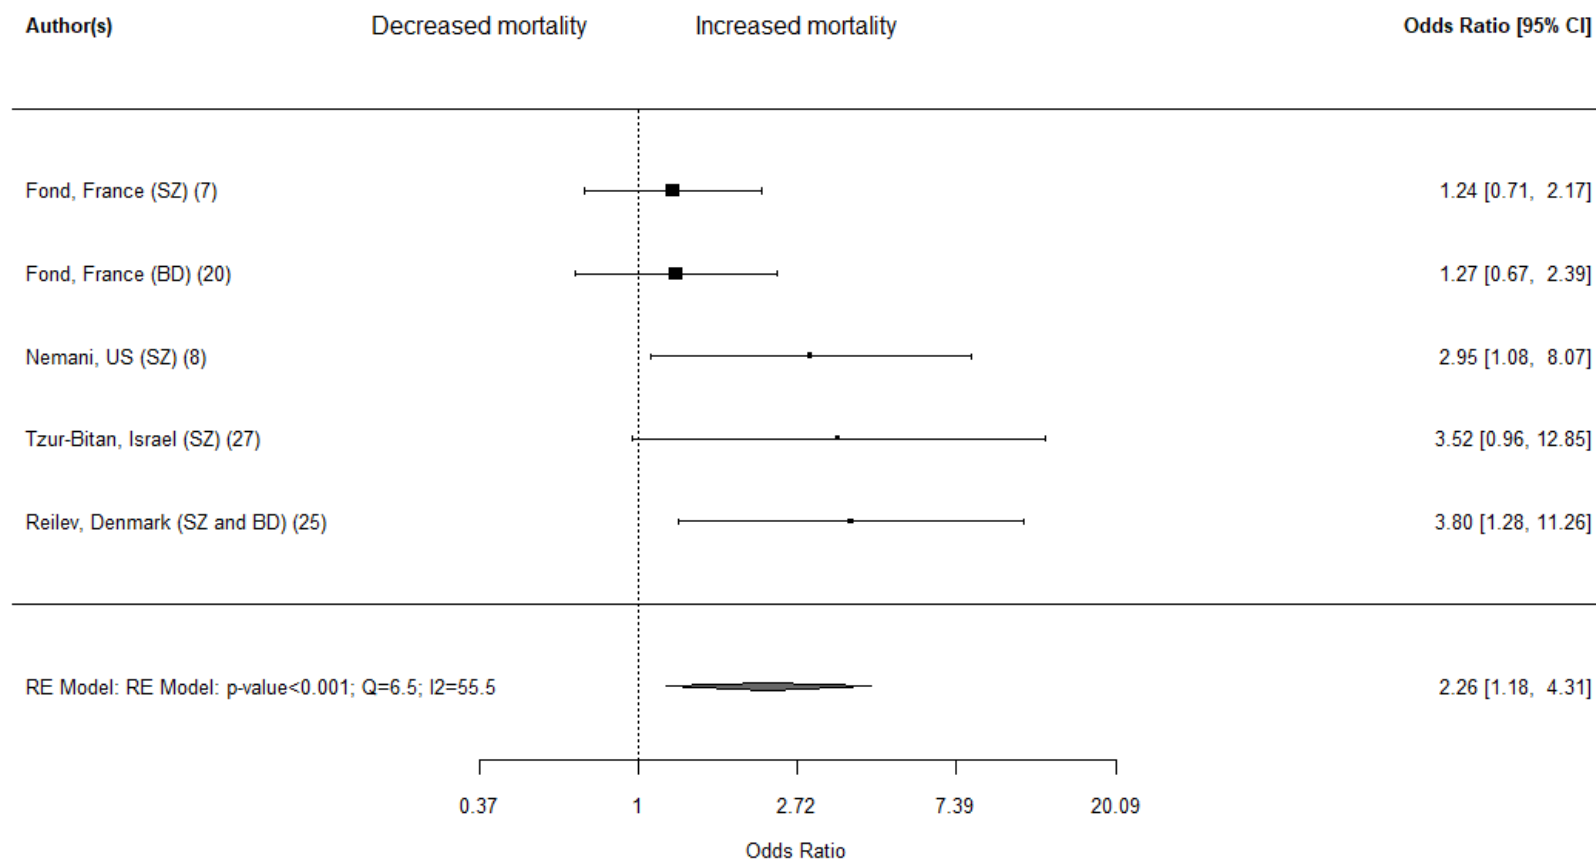

Severe mental health disorders were defined by schizophrenia spectrum disorder and/or bipolar disorders.  
BD: Bipolar disorders; SZ: Schizophrenia.
